# Supplementary material
Source: PubMed Central journal article supplement (PMC8458077)
Supplement: annrheumdis-2021-220626supp001.pdf [file annrheumdis-2021-220626supp001.pdf]

| Characteristic       |                     | Number<br>n=140 (%) |
|----------------------|---------------------|---------------------|
| <b>Gender</b>        | Male                | 75 (53.6)           |
| <b>Age</b>           | Years (median(IQR)) | 52.35 (38.9-63.)    |
| <b>Ethnicity</b>     | Caucasian           | 70 (50.0)           |
|                      | Afro-Caribbean      | 12 (8.6)            |
|                      | South Asian         | 39 (27.9)           |
|                      | Multi-racial        | 7 (5.0)             |
|                      | Other               | 12 (8.6)            |
| <b>Diagnosis</b>     | AAV/anti-GBM        | 51 (36.4)           |
|                      | MCD/FSGS            | 30 (21.4)           |
|                      | MN                  | 31 (22.1)           |
|                      | SLE                 | 22 (15.7)           |
|                      | Other               | 6 (4.2)             |
| <b>Comorbidities</b> | Diabetes            | 20 (14.3)           |
|                      | Asthma/COPD         | 28 (20.0)           |
|                      | Previous malignancy | 7 (5.0)             |
| <b>Immunotherapy</b> | Previous Rituximab  | 115 (82.1)          |
|                      | Tacrolimus          | 23 (16.4)           |
|                      | Azathioprine        | 13 (9.3)            |
|                      | MMF                 | 23 (16.4)           |
|                      | Methotrexate        | 3 (2.1)             |
|                      | Prednisolone        | 59 (42.1)           |
|                      | Belimumab           | 5 (3.6)             |
|                      | No current IS       | 9 (6.4)             |
|                      | Previous CYP        | 66 (4.7)            |
| <b>Vaccine</b>       | AZ/ChAdOx1          | 36 (25.7)           |
|                      | Pfizer/ BNT162b2    | 104 (74.3)          |

Table S1. Characteristics of patient cohort

AAV- ANCA associated vasculitis, GBM- Glomerular basement membrane, FSGS- Focal segmental glomerulosclerosis, MN- Membranous nephropathy, MCD- Minimal change disease, C3GN- C3 glomerulopathy, IgG4RD- IgG4 related disease, CYP-Cyclophosphamide, IS- Immunosuppression

|             |                  | HC First dose<br>n=70 | IS First dose<br>n=119 | IS First dose matched<br>(serology)<br>n=88 | IS First dose matched<br>(cellular responses)<br>n=36 |
|-------------|------------------|-----------------------|------------------------|---------------------------------------------|-------------------------------------------------------|
| Gender      | Male             | 29 (41.4)             | 62 (52.1)              | 48 (54.5)                                   | 20 (55.6)                                             |
|             | Female           | 41 (58.6)             | 57 (47.9)              | 40 (45.5)                                   | 16 (44.4)                                             |
| Age (years) |                  | 41.4 (33.0-55.0)      | 53.56 (39.3-63.2)      | 46.2 (36.0-57.6)                            | 46.6 (38.9-58.3)                                      |
| Vaccine     | AZ/ChAdOx1       | 12 (17.1)             | 34 (28.6)              | 25 (28.4)                                   | 15 (41.7)                                             |
|             | Pfizer/ BNT162b2 | 58 (82.9)             | 85 (71.4)              | 63 (71.6)                                   | 21 (58.3)                                             |

|             |                  | HC Second dose<br>n=54 | IS Second dose<br>n=91 | IS Second dose<br>matched (serology)<br>n=49 | IS Second dose<br>matched (cellular<br>responses) n=19 |
|-------------|------------------|------------------------|------------------------|----------------------------------------------|--------------------------------------------------------|
| Gender      | Male             | 22 (40.7)              | 42 (46.2)              | 26 (53.1)                                    | 11 (57.9)                                              |
|             | Female           | 32 (59.2)              | 49 (53.8)              | 23 (46.9)                                    | 8 (42.1)                                               |
| Age (years) |                  | 42.8 (36.7-52.2)       | 54.3 (40.0- 64.0)      | 46.6 (35.1-57.6)                             | 51.6 (36.0-59.6)                                       |
| Vaccine     | AZ/ChAdOx1       | 0                      | 22 (24.2)              | 0                                            | 0                                                      |
|             | Pfizer/ BNT162b2 | 54 (100)               | 69 (75.8)              | 49 (100)                                     | 19 (100)                                               |

**Table S2A. Characteristics of healthy control cohort, IS cohort and matched cohorts for assessment of 1<sup>st</sup> dose responses**

| Characteristic       |                     | First Dose |                         |                  |         | Second Dose |                    |                  |      |
|----------------------|---------------------|------------|-------------------------|------------------|---------|-------------|--------------------|------------------|------|
|                      |                     | n=         | No response<br>n=32 (%) | Response<br>n=18 | p=      | n=          | No response<br>n=4 | Response<br>n=42 | p=   |
| <b>Gender</b>        | Male                | 31         | 21 (67.7)               | 10 (32.3)        |         | 27          | 2 (7.4)            | 25 (92.6)        |      |
|                      | Female              | 19         | 11 (57.9)               | 8 (42.1)         |         | 19          | 2 (10.5)           | 17 (89.5)        |      |
| <b>Age</b>           | Years (IQR)         |            | 53.4 (42.7-64.1)        | 53.9 (40.0-60.4) |         |             | 67.5 (61.9-69.8)   | 54.7 (41.4-63.8) | 0.03 |
| <b>Ethnicity</b>     | White               | 28         | 19 (67.9)               | 9 (32.1)         |         | 24          | 3 (12.5)           | 21 (87.5)        |      |
|                      | Black               | 1          | 1 (100)                 | 0                |         | 2           | 0                  | 2 (100)          |      |
|                      | South Asian         | 19         | 11 (57.9)               | 8 (42.1)         |         | 18          | 1 (5.6)            | 17 (94.4)        |      |
|                      | Multi-racial        | 2          | 1 (50.0)                | 1 (50.0)         |         | 1           | 0                  | 1 (100)          |      |
|                      | Other               | 0          | 0                       | 0                |         | 1           | 0                  | 1 (100)          |      |
| <b>Diagnosis</b>     | AAV/anti-GBM        | 24         | 13 (54.2)               | 11 (45.8)        |         | 19          | 1 (5.3)            | 18 (94.7)        |      |
|                      | MCD/FSGS            | 15         | 11 (73.3)               | 4 (26.7)         |         | 15          | 2 (13.3)           | 13 (86.7)        |      |
|                      | MN                  | 10         | 7 (70.0)                | 3 (30.0)         |         | 9           | 1 (11.1)           | 8 (88.9)         |      |
|                      | SLE                 | 0          | 0                       | 0                |         | 2           | 0                  | 2 (100)          |      |
|                      | Other               | 1          | 1 (100)                 | 0                |         | 1           | 0                  | 1 (100)          |      |
| <b>Comorbidities</b> | Diabetes            | 10         | 7 (70.0)                | 3 (30.0)         |         | 8           | 2 (25.0)           | 6 (75.0)         |      |
|                      | Asthma/COPD         | 10         | 6 (60.0)                | 4 (40.0)         |         | 11          | 0                  | 11 (100)         |      |
|                      | Previous malignancy | 0          | 0                       | 0                |         | 0           | 0                  | 0                |      |
| <b>Immunotherapy</b> | Rituximab           | 44         | 28 (63.6)               | 16 (36.4)        | 0.04    | 41          | 4 (9.8)            | 37 (91.2)        |      |
|                      | Last 6 months       | 32         | 21 (65.6)               | 11 (34.4)        |         | 28          | 3 (10.7)           | 25 (89.3)        |      |
|                      | Tacrolimus          | 11         | 10 (90.1)               | 1 (9.1)          |         | 12          | 0                  | 12 (100)         |      |
|                      | Azathioprine        | 4          | 2 (50.0)                | 2 (50.0)         |         | 3           | 0                  | 3 (100)          |      |
|                      | MMF                 | 5          | 3 (60.0)                | 2 (40.0)         |         | 4           | 0                  | 4 (100)          |      |
|                      | Methotrexate        | 0          | 0                       | 0                |         | 1           | 0                  | 1 (100)          |      |
|                      | Prednisolone        | 17         | 14 (82.4)               | 3 (17.6)         |         | 14          | 1 (7.1)            | 13 (92.9)        |      |
|                      | ≥10mg               | 5          | 3 (60.0)                | 2 (40.0)         |         | 3           | 1 (33.3)           | 2 (66.7)         |      |
|                      | Belimumab           | 0          | 0                       | 0                |         | 0           | 0                  | 0                |      |
|                      | No IS               | 1          | 1 (100)                 | 0                |         | 1           | 0                  | 1 (100)          |      |
| CYP                  | 25                  | 14 (56.0)  | 11 (44.0)               | 20               | 1 (5.0) | 19 (95.0)   |                    |                  |      |
| <b>Vaccine</b>       | AZ/ChAdOx1          | 22         | 12 (54.5)               | 10 (45.5)        |         | 17          | 1 (5.9)            | 16 (94.1)        |      |

|                           |                        |    |           |           |  |    |          |           |  |
|---------------------------|------------------------|----|-----------|-----------|--|----|----------|-----------|--|
|                           | Pfizer/ BNT162b2       | 28 | 20 (71.4) | 8 (28.6)  |  | 29 | 3 (10.3) | 26 (89.7) |  |
| <b>Clinical parameter</b> | B cell depletion       | 33 | 23 (69.7) | 10 (30.3) |  | 30 | 3 (10.0) | 27 (90.0) |  |
|                           | Hypogammaglobulinaemia | 13 | 10 (76.9) | 3 (13.1)  |  | 9  | 3 (33.3) | 6 (66.7)  |  |

**Table S3. Patient characteristics by combined immunological response in those with no evidence of previous natural infection**
